# Supplementary material for: Base-mediated transformation of the agostic (π-allyl)-closo-rhodacarboranes into complexes with an open (1-5-η5)-pentadienyl ligand
Source: Royal Society of Chemistry journal article supplement (doi:10.1039/c3dt52838c), 2014-01-01

**Base-Mediated Transformation of the Agostic ( $\pi$ -Allyl)-*closo*-rhodacarboranes into  
Complexes with an Open  $\eta^5$ -Pentadienyl ligand**

**Konstantin I. Galkin, Fedor M. Dolgushin, Alexander F. Smol'yakov, Elena A. Sergeeva,  
Ivan A. Godovikov, and Igor T. Chizhevsky\***

**SUPPORTING INFORMATION**

**Figure 1,2.** 400.13 MHz 2D [ $^1\text{H}$ - $^1\text{H}$ ]-COSY (a) and 100.61 MHz 2D [ $^1\text{H}$ - $^{13}\text{C}$ ]-HMBC (b) NMR spectra of the complex **4** in  $\text{CD}_2\text{Cl}_2$  solution at 20 °C showing the assignment of the some proton and carbon resonances.

(a)

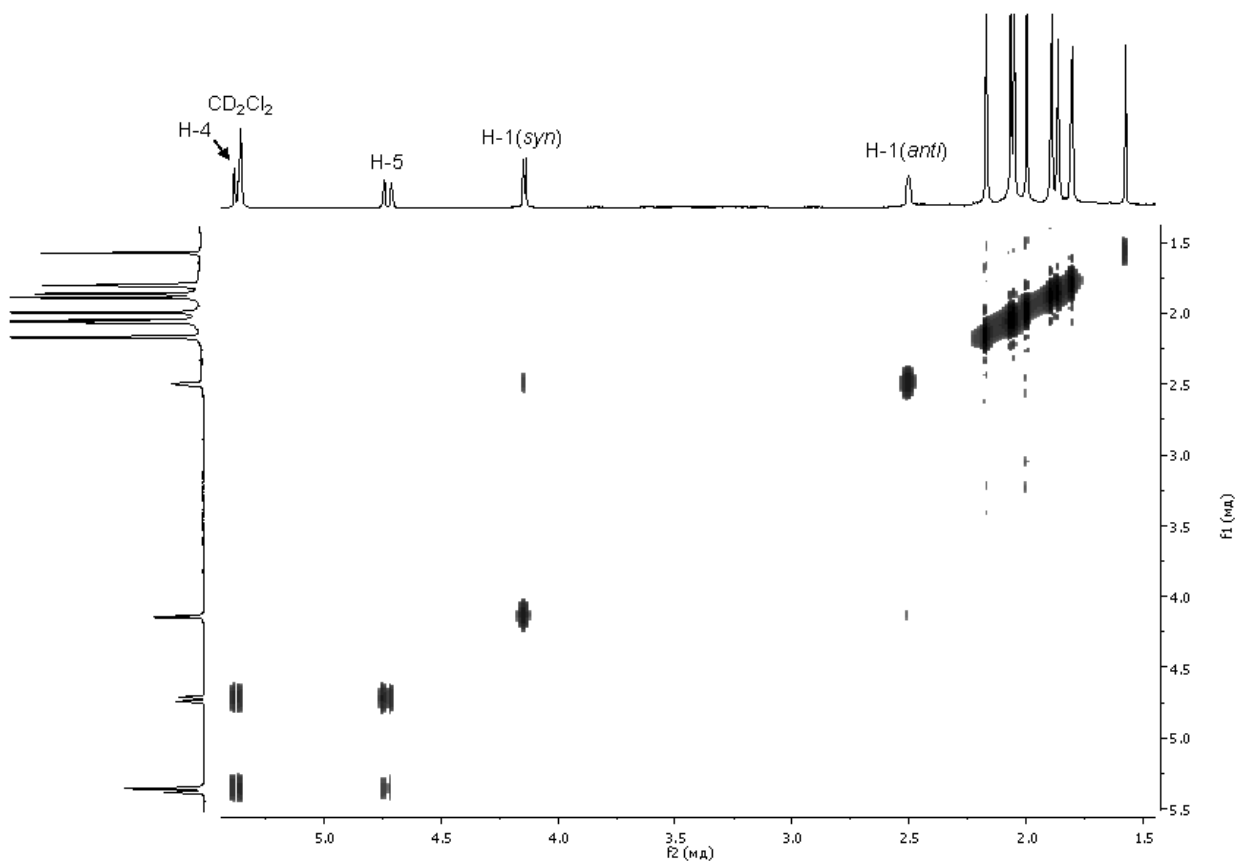

(b)

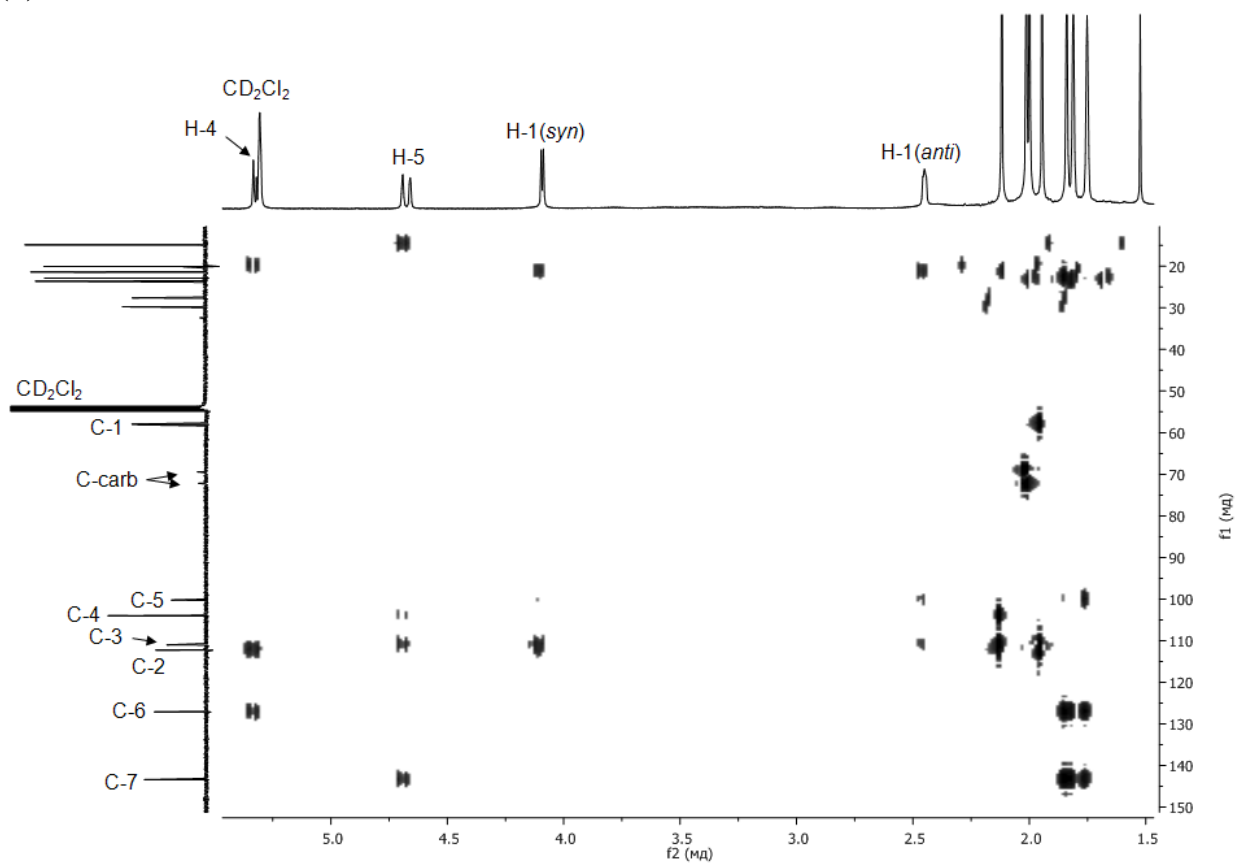

Supplement: c3dt52838c.pdf [file c3dt52838c.pdf]
